# Supplementary material for: In situ approach to fabricate heterojunction p–n CuO–ZnO nanostructures for efficient photocatalytic reactions
Source: Royal Society of Chemistry journal article supplement (doi:10.1039/d0nj03770b), 2020-01-01
Supplement: d0nj03770b1.pdf [file d0nj03770b1.pdf]

## Supplementary Information (SI)

**Fig. S1** (a) Controlled growth of ZnO nanowires in the presence of equimolar HMTA and  $\text{ZnNO}_3$  precursor salt solution (1:1) for 6 h, (b) 12 h and (c) 24 h reaction at  $90^\circ\text{C}$ .

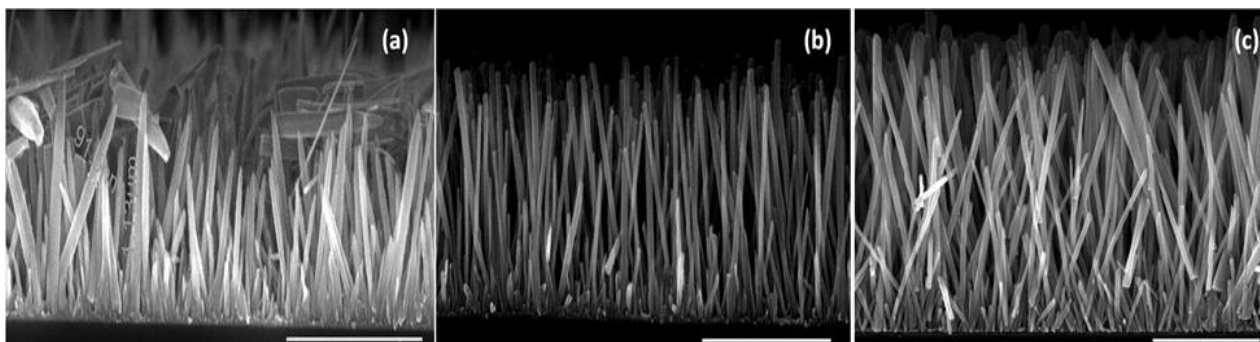

**Fig. S2** Time dependent study of ZnO-CuO nanocomposite structure formed by in-situ approach with different copper content (a)  $\text{Cu}_{0.1}$  after 6 h reaction, (b)  $\text{Cu}_{0.1}$ , 12 h reaction, (c)  $\text{Cu}_{0.1}$ , 24 h reaction, (d)  $\text{Cu}_{0.2}$ , 6 h reaction, (e)  $\text{Cu}_{0.2}$ , 12 h reaction, (f)  $\text{Cu}_{0.2}$ , 24 h reaction, (g)  $\text{Cu}_{0.5}$ , 6 h reaction, (h)  $\text{Cu}_{0.5}$ , 12 h reaction, (i)  $\text{Cu}_{0.5}$ , 24 h reaction, (j)  $\text{Cu}_1:\text{Zn}_1$ , 6 h reaction, (k)  $\text{Cu}_1:\text{Zn}_1$ , 12 h reaction, and (l)  $\text{Cu}_1:\text{Zn}_1$ , 24 h reaction. The scale in the image is  $1\ \mu\text{m}$ .

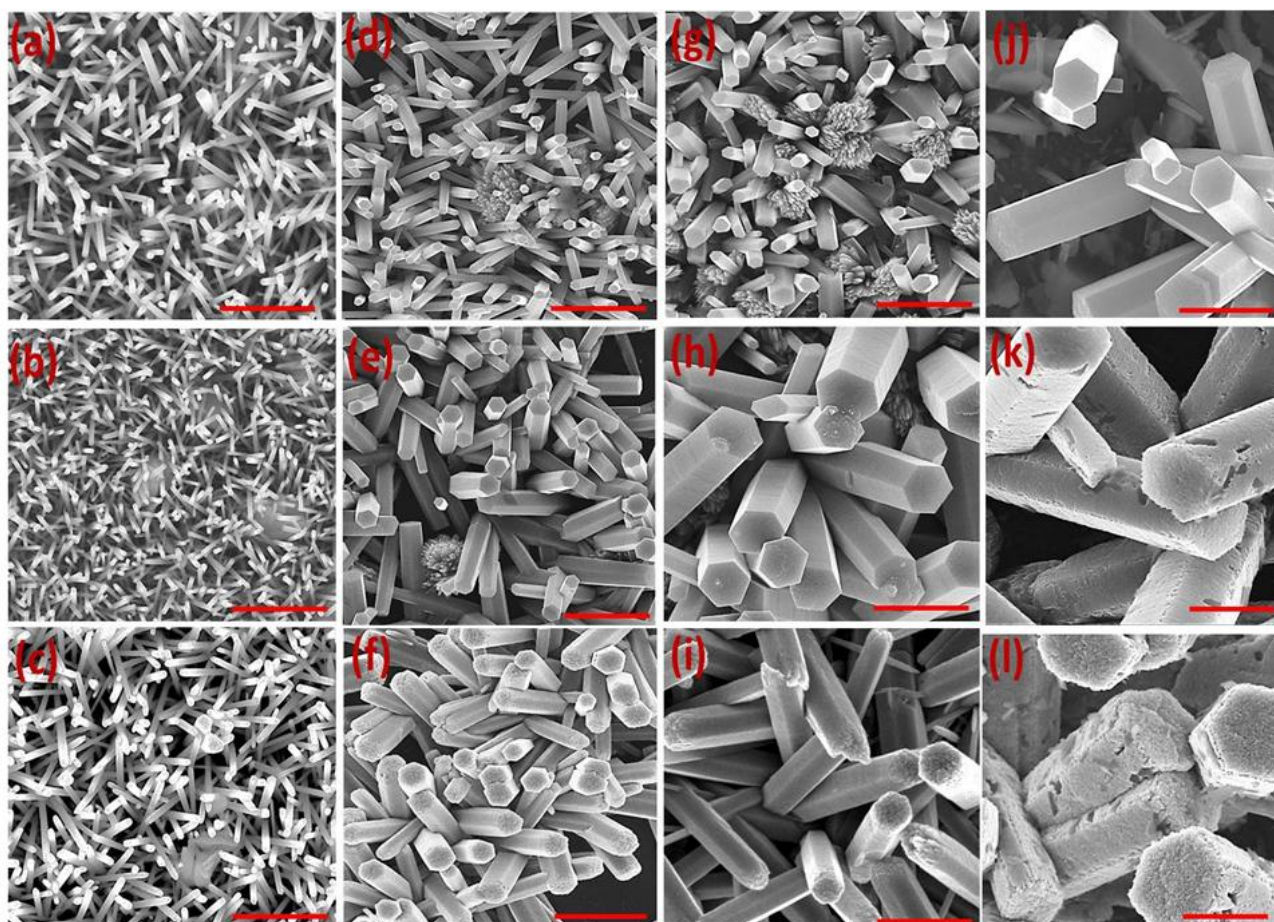

**Fig. S3** UV-Vis absorption spectra of CuO-ZnO NCST synthesized by in-situ approach.

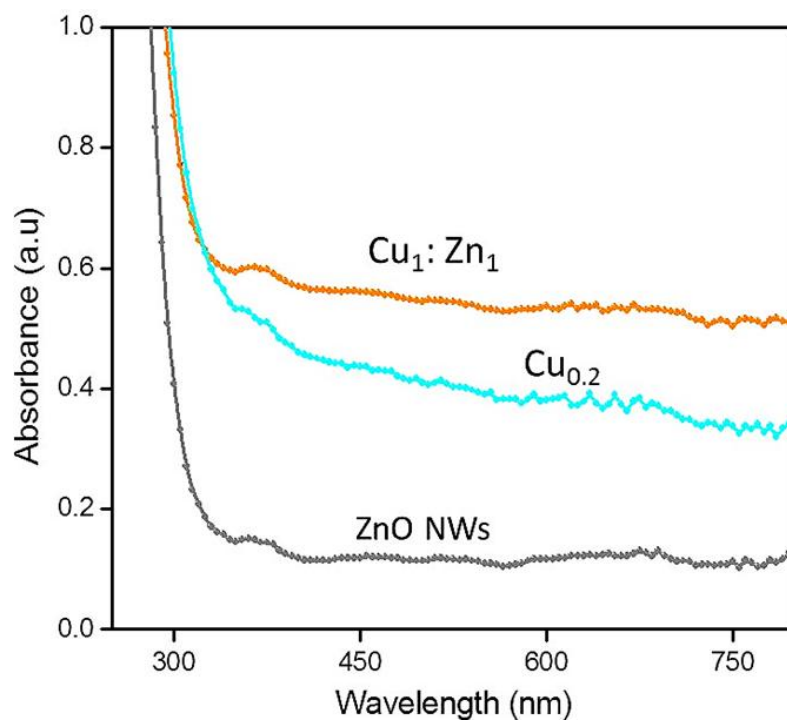

**Fig. S4** SEM-EDX images of flower like CuO-ZnO NCS prepared by using molar ratio of 2 [(Cu(NO<sub>3</sub>)<sub>2</sub> : Zn(NO<sub>3</sub>)<sub>2</sub>)] : HMTA.

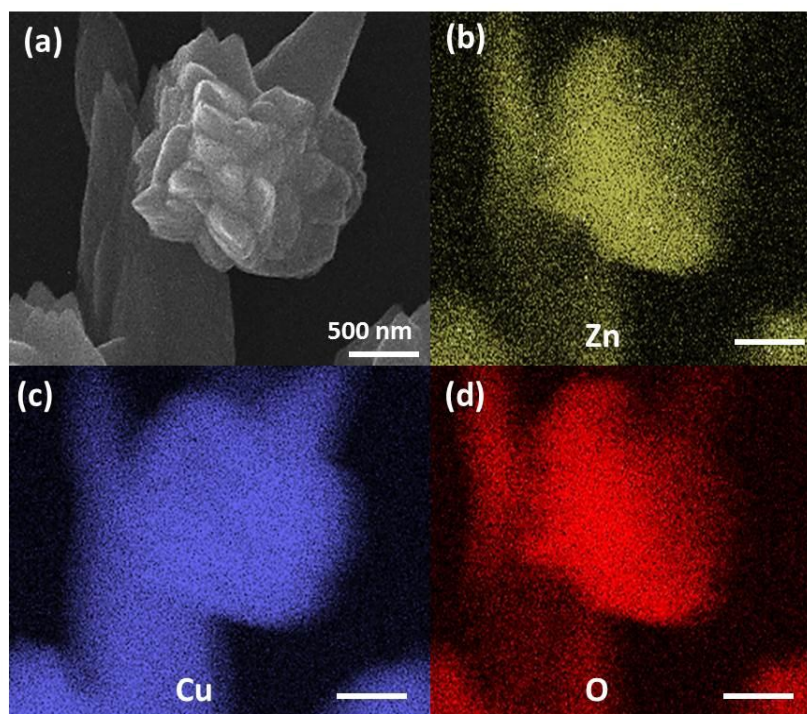



**Fig. S5** ZnO-CuO metal mixed oxide nanostructures formed after impregnating ZnO NWs with copper precursor solution in the absence of Zn salt solution.

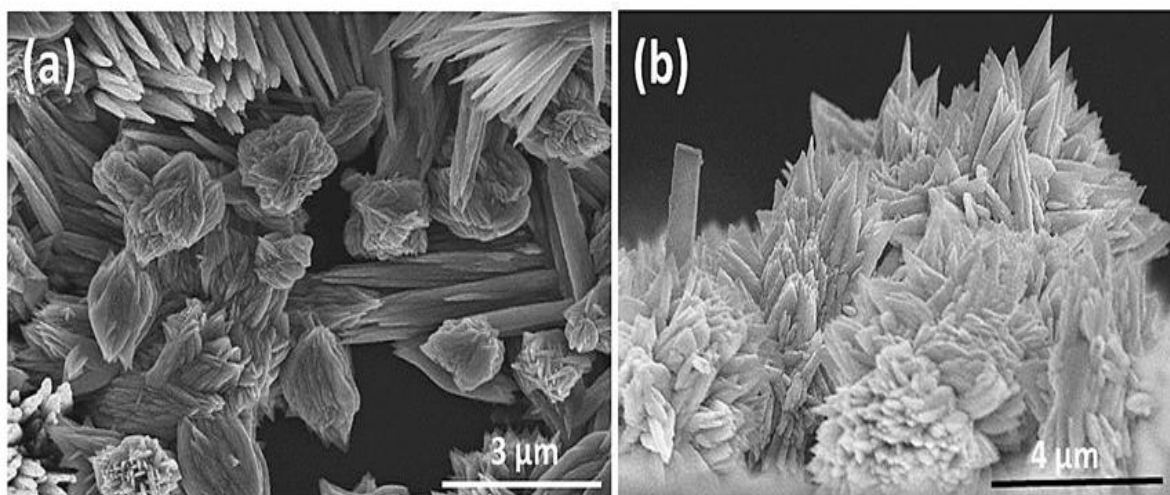

**Fig. S6** (a) Photoluminescence spectra of ZnO NWs and CuO-ZnO nanocomposites formed after impregnation and (b) near band edge emission with impregnation growth process does not displaying appreciable shift.

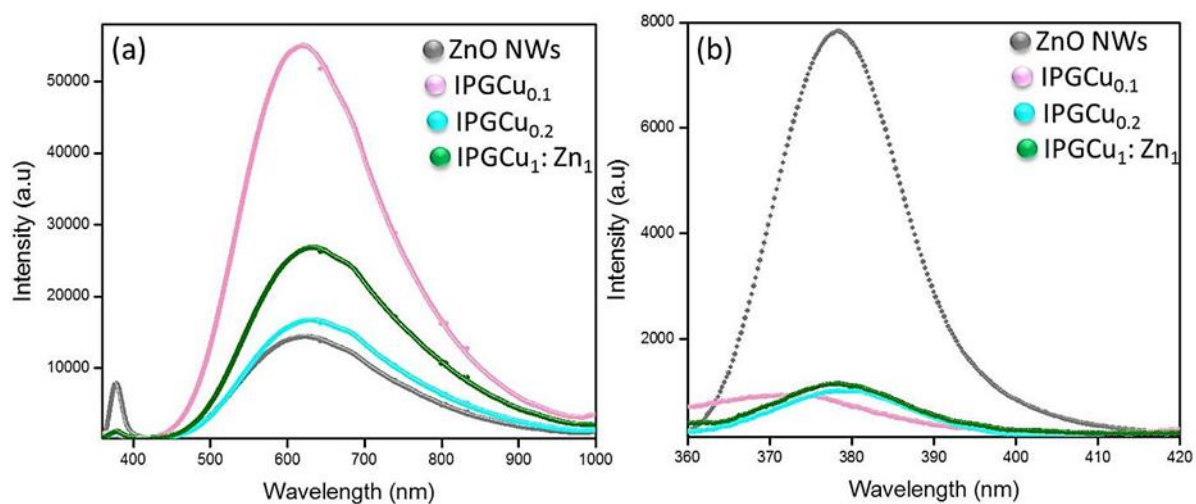

**SI Table 1** Parameters consider for the synthesis of CuO-ZnO nanostructures by in-situ approach.

| S. No. | Ratio         | Molar ratio | Reaction time | Resultant structure                      |
|--------|---------------|-------------|---------------|------------------------------------------|
| 1.     | 0.2 : 0.8 : 1 | –           | 6 – 24 h      | –                                        |
| 2.     | 0.5 : 0.5 : 1 | 0.5         | 6 – 24 h      | Very rough CuO-ZnO PIL-NCST, etched tips |
| 3.     | 1 : 1 : 1     | 1           | 6 – 24 h      | CuO-ZnO PIL-NCST with CuO as outgrowths  |
| 4.     | 1 : 1 : 2     | 0.5         | 6 – 24 h      | Rough CuO-ZnO PIL-NCST, etched tips      |
| 5.     | 1 : 1 : 4     | 0.25        | 6 – 24 h      | CuO-ZnO PIL-NCST with CuO on the tips    |
| 6.     | 1 : 1 : 0.5   | 2           | 6 – 24 h      | Flower like structure                    |
